# Supplementary material for: Designing and screening of fluoroquinolone substitutes using combined in silico approaches: biological metabolism–bioconcentration bilateral selection and their mechanism analyses
Source: Royal Society of Chemistry journal article supplement (doi:10.1039/d2gc00487a), 2022-01-01
Supplement: d2gc00487a2.pdf [file d2gc00487a2.pdf]

Supplementary Information for

**Designing and screening of fluoroquinolone substitutes using combined in-silico approaches:  
biological metabolism-bioconcentration bilateral selection and their mechanism analyses**

Qikun Pu<sup>a, b</sup>, Zhenzhen Han<sup>a, b</sup>, Xinao Li<sup>a, b</sup>, Qing Li<sup>a, b</sup>, Yu Li<sup>a, b\*</sup>

<sup>a</sup> College of Environmental Science and Engineering, North China Electric Power University, Beijing,  
102206, China.

<sup>b</sup> MOE Key Laboratory of Resources and Environmental System Optimization, North China Electric  
Power University, Beijing, 102206, China.

**\*Corresponding author:** Yu Li: liyuxx8@hotmail.com

**The e-mail addresses of all authors:**

Qikun Pu: puqikun2000@163.com; Zhenzhen Han: hzzicy1102@163.com; Xinao Li:

lixinao921734261@163.com; Qing Li: lq0226@outlook.com

## **2. Materials and methods**

### **2.4. Construction of the 3D-QSA<sup>2</sup>R model for the bidirectional selective effect of the biological metabolism and concentration of FQs using the SYBYL-X2.0**

In this study, the comparative molecular similarity index analysis (CoMSIA) was used to construct the model; according to the three-dimensional quantitative structure-activity relationship between molecular structure and BSEV of FQs, the least square method was used for the analysis.<sup>1</sup> The leave-one-out method was used to cross-validate the training set compounds, and the cross-validation coefficient  $q^2$  and the best principal component N were obtained. Regression analysis by non-cross validation was performed, and the non-cross validation coefficient  $r^2$ , standard deviation SEE, and test value F were evaluated. The  $Q^2_{\text{ext}}$  and cSDEP values were obtained by the perturbation stability test. Finally,  $r^2_{\text{pred}}$  was obtained by cross-validation of test sets (Cross-Validate). After the above parameters met the requirements, the CoMSIA model was constructed.<sup>2</sup> According to the "View QSAR" module in the constructed 3D-QSA<sup>2</sup>R model, the three-dimensional contour maps of the CoMSIA model were analyzed to determine the substitution groups and substitution sites of the target molecule.

### **2.6. Drug effect, human health, and ecological risk evaluation of the substitutes of FQs**

#### **2.6.1. Evaluation of the effect of the substitutes of FQs using the ADMET model**

The ADMET model in the Discovery Studio 2020 (DS) software can provide an efficacy evaluation model (water solubility at 25 °C, permeability of blood-brain barrier, intestinal absorption, human cytochrome P450 2D6 enzyme binding, and plasma protein binding), which can be used to predict the absorption, distribution, metabolism, excretion, and hepatotoxicity of substitute molecules.<sup>3</sup>

#### **2.6.2. Human health and ecological risk evaluation of the substitutes of FQs using the TOPKAT model**

Based on the DS software ADMET module, the hepatotoxicity of the substitute molecules was predicted, and the TOPKAT module was used to predict the toxicity of the substitute molecule.<sup>4</sup> The TOPKAT module contains 14 toxicity prediction models. In the study, Rodent Carcinogenicity (NTP

and FDA), Mutagenicity (Ames test), Developmental Toxicity Potential (DTP), Skin Sensitization, Skin Irritancy, Ocular Irritancy, Rat Chronic Oral LOAEL, Rat Oral LD<sub>50</sub>, and Inhalational LC<sub>50</sub> were selected as human health risk evaluation parameters. Fathead Minnow LC<sub>50</sub>, and Daphnia Magna EC<sub>50</sub>, and Aerobic Biodegradability were used as the ecological risk evaluation parameters.

### 3. Results and discussion

#### 3.5. Drug characteristics, human health and ecological risk evaluation of NOR substitute molecules based on ADMET and TOPKAT

##### 3.5.1. Evaluation of molecular drug properties of NOR substitutes based on the ADMET model

The ADMET model was used to predict and evaluate the absorption, distribution, metabolism, excretion, and toxicity of 30 NOR substitutes. The results of the prediction and evaluation are shown in Table S4 and Fig. S1.

**Table S1** The  $\Delta G_b$  of FQs of metabolic and concentration enzymes and their BSEV in fish

| Compounds             | FQs           | Binding energy (kJ/mol) |              | Dimensionless values |       | BSEV  |
|-----------------------|---------------|-------------------------|--------------|----------------------|-------|-------|
|                       |               | Dock to 4R1Z            | Dock to 4HGM | BMI                  | BEI   |       |
| 1 <sup>b, c, f</sup>  | Amifloxacin   | -24.027                 | -47.049      | 0.000                | 0.799 | 0.336 |
| 2 <sup>a, c, e</sup>  | Balofloxacin  | -84.667                 | -150.620     | 0.913                | 0.000 | 0.529 |
| 3 <sup>a, d</sup>     | Besifloxacin  | -74.005                 | -39.721      | 0.752                | 0.856 | 0.796 |
| 4 <sup>a, c, e</sup>  | Cinoxacin     | -44.157                 | -40.624      | 0.303                | 0.849 | 0.532 |
| 5 <sup>a, c</sup>     | Ciprofloxacin | -40.829                 | -65.347      | 0.253                | 0.658 | 0.423 |
| 6 <sup>e</sup>        | Clinafloxacin | -60.209                 | -106.563     | 0.545                | 0.340 | 0.459 |
| 7 <sup>a, f</sup>     | Danofloxacin  | -57.717                 | -23.322      | 0.507                | 0.982 | 0.707 |
| 8 <sup>c</sup>        | Difloxacin    | -61.187                 | -101.864     | 0.559                | 0.376 | 0.482 |
| 9 <sup>a</sup>        | Enoxacin      | -55.361                 | -60.869      | 0.472                | 0.693 | 0.565 |
| 10 <sup>a, d, e</sup> | Enrofloxacin  | -50.994                 | -46.514      | 0.406                | 0.803 | 0.573 |
| 11 <sup>a, c, e</sup> | Fleroxacin    | -46.226                 | -40.395      | 0.334                | 0.851 | 0.551 |
| 12 <sup>a, d, e</sup> | Gatifloxacin  | -57.319                 | -109.039     | 0.501                | 0.321 | 0.425 |
| 13 <sup>a</sup>       | Grepafloxacin | -52.775                 | -63.598      | 0.433                | 0.671 | 0.533 |
| 14 <sup>e</sup>       | Levofloxacin  | -90.464                 | -33.756      | 1.000                | 0.902 | 0.959 |
| 15 <sup>c, e</sup>    | Lomefloxacin  | -85.240                 | -47.657      | 0.921                | 0.795 | 0.868 |

|                             |                |         |         |       |       |       |
|-----------------------------|----------------|---------|---------|-------|-------|-------|
| 16 <sup>c, e</sup>          | Marbofloxacin  | -51.146 | -21.026 | 0.408 | 1.000 | 0.657 |
| 17 <sup>a, c, e</sup>       | Moxifloxacin   | -90.298 | -95.608 | 0.998 | 0.424 | 0.756 |
| 18 <sup>a, c, e</sup>       | Nadifloxacin   | -45.464 | -60.359 | 0.323 | 0.696 | 0.480 |
| 19 <sup>a, c, d, e</sup>    | Norfloxacin    | -28.525 | -63.290 | 0.068 | 0.674 | 0.323 |
| 20                          | Orbifloxacin   | -59.639 | -23.299 | 0.536 | 0.982 | 0.723 |
| 21 <sup>b, c, f</sup>       | Pefloxacin     | -44.545 | -42.147 | 0.309 | 0.837 | 0.531 |
| 22 <sup>a, b, d, e, f</sup> | Pipemidic Acid | -40.489 | -33.154 | 0.248 | 0.906 | 0.524 |
| 23 <sup>b, e</sup>          | Rufloxacin     | -68.873 | -24.040 | 0.675 | 0.977 | 0.802 |
| 24 <sup>b</sup>             | Sitafloxacin   | -63.058 | -63.333 | 0.587 | 0.674 | 0.624 |
| 25 <sup>a, c</sup>          | Sparfloxacin   | -68.076 | -62.747 | 0.663 | 0.678 | 0.669 |
| 26 <sup>b, c, e</sup>       | Temafloxacin   | -74.066 | -29.166 | 0.753 | 0.937 | 0.830 |

---

a: The bidirectional selectivity effect 3D-QSA2R model training set and b: Test set; c: Bio-metabolic model training set and d: Test set;  
e: Bio-concentration model training set and f: Test set.

**Table S2** Predicting the NOR substitutes using the 3D-QSA<sup>2</sup>R model and screening of the 3D-QSAR model based on bio-metabolism effect and bio-concentration effect.

| Compounds | Substituent groups | BMI   | Change rate (%) | BEI   | Change rate (%) | BSEV  | Change rate (%) | Compounds | Substituent groups | BMI   | Change rate (%) | BEI   | Change rate (%) | BSEV  | Change rate (%) |
|-----------|--------------------|-------|-----------------|-------|-----------------|-------|-----------------|-----------|--------------------|-------|-----------------|-------|-----------------|-------|-----------------|
| NOR       |                    | 0.066 |                 | 0.674 |                 | 0.314 |                 |           |                    | 0.066 |                 | 0.674 |                 | 0.314 |                 |
| N-001     | 1-A                | 0.153 | 131.82          | 0.732 | 8.61            | 0.363 | 15.61           | N-062     | 1-A, 4-I           | 0.287 | 334.85          | 0.660 | -2.08           | 0.422 | 34.39           |
| N-002     | 1-B                | 0.221 | 234.85          | 0.621 | -7.86           | 0.338 | 7.64            | N-063     | 1-A,4-S            | 0.185 | 180.30          | 0.842 | 24.93           | 0.429 | 36.62           |
| N-003     | 1-C                | 0.201 | 204.55          | 0.628 | -6.82           | 0.338 | 7.64            | N-064     | 1-A, 4-J           | 0.240 | 263.64          | 0.864 | 28.19           | 0.456 | 45.22           |
| N-004     | 1-D                | 0.545 | 725.76          | 0.435 | -35.46          | 0.482 | 53.50           | N-065     | 1-G, 4-O           | 0.324 | 390.91          | 0.767 | 13.80           | 0.475 | 51.27           |
| N-005     | 1-E                | 0.395 | 498.48          | 0.593 | -12.02          | 0.403 | 28.34           | N-066     | 1-G, 4-H           | 0.323 | 389.39          | 0.817 | 21.22           | 0.476 | 51.59           |
| N-006     | 1-F                | 0.217 | 228.79          | 0.603 | -10.53          | 0.339 | 7.96            | N-067     | 1-G, 4-A           | 0.265 | 301.52          | 0.704 | 4.45            | 0.442 | 40.76           |
| N-007     | 1-G                | 0.208 | 215.15          | 0.684 | 1.48            | 0.360 | 14.65           | N-068     | 1-G, 4-G           | 0.323 | 389.39          | 0.768 | 13.95           | 0.446 | 42.04           |
| N-008     | 1-H                | 0.056 | -15.15          | 0.789 | 17.06           | 0.352 | 12.10           | N-069     | 1-G, 4-E           | 0.313 | 374.24          | 0.854 | 26.71           | 0.474 | 50.96           |
| N-009     | 1-I                | 0.312 | 372.73          | 0.672 | -0.30           | 0.411 | 30.89           | N-070     | 1-G, 4-D           | 0.332 | 403.03          | 0.845 | 25.37           | 0.478 | 52.23           |
| N-010     | 1-J                | 0.404 | 512.12          | 0.536 | -20.47          | 0.432 | 37.58           | N-071     | 1-G, 4-P           | 0.338 | 412.12          | 0.798 | 18.40           | 0.487 | 55.10           |
| N-011     | 1-K                | 0.628 | 851.52          | 0.490 | -27.30          | 0.499 | 58.92           | N-072     | 1-G, 4-C           | 0.316 | 378.79          | 0.848 | 25.82           | 0.464 | 47.77           |
| N-012     | 1-L                | 0.616 | 833.33          | 0.558 | -17.21          | 0.500 | 59.24           | N-073     | 1-G, 4-I           | 0.331 | 401.52          | 0.627 | -6.97           | 0.432 | 37.58           |
| N-013     | 1-M                | 0.349 | 428.79          | 0.680 | 0.89            | 0.406 | 29.30           | N-074     | 1-G, 4-S           | 0.265 | 301.52          | 0.820 | 21.66           | 0.448 | 42.68           |
| N-014     | 1-N                | 0.143 | 116.67          | 0.660 | -2.08           | 0.316 | 0.64            | N-075     | 1-G, 4-J           | 0.340 | 415.15          | 0.844 | 25.22           | 0.484 | 54.14           |
| N-015     | 2-A                | 0.230 | 248.48          | 0.811 | 20.33           | 0.389 | 23.89           | N-076     | 2-A, 3-Q           | 0.239 | 262.12          | 0.803 | 19.14           | 0.391 | 24.52           |
| N-016     | 2-G                | 0.104 | 57.58           | 0.679 | 0.74            | 0.312 | -0.64           | N-077     | 2-C, 3-Q           | 0.171 | 159.09          | 0.672 | -0.30           | 0.327 | 4.14            |

|       |     |        |         |       |        |       |        |       |          |       |        |       |       |       |       |
|-------|-----|--------|---------|-------|--------|-------|--------|-------|----------|-------|--------|-------|-------|-------|-------|
| N-017 | 2-H | 0.022  | -66.67  | 0.609 | -9.64  | 0.288 | -8.28  | N-078 | 2-D, 3-Q | 0.266 | 303.03 | 0.807 | 19.73 | 0.397 | 26.43 |
| N-018 | 2-C | 0.157  | 137.88  | 0.681 | 1.04   | 0.314 | 0.00   | N-079 | 2-A, 4-O | 0.266 | 303.03 | 0.848 | 25.82 | 0.477 | 51.91 |
| N-019 | 2-E | 0.149  | 125.76  | 0.664 | -1.48  | 0.353 | 12.42  | N-080 | 2-A, 4-A | 0.236 | 257.58 | 0.908 | 34.72 | 0.464 | 47.77 |
| N-020 | 2-D | 0.181  | 174.24  | 0.740 | 9.79   | 0.328 | 4.46   | N-081 | 2-A, 4-H | 0.262 | 296.97 | 0.872 | 29.38 | 0.487 | 55.10 |
| N-021 | 2-F | 0.176  | 166.67  | 0.653 | -3.12  | 0.320 | 1.91   | N-082 | 2-A, 4-G | 0.271 | 310.61 | 0.947 | 40.50 | 0.468 | 49.04 |
| N-022 | 2-M | 0.109  | 65.15   | 0.672 | -0.30  | 0.347 | 10.51  | N-083 | 2-A, 4-E | 0.252 | 281.82 | 0.891 | 32.20 | 0.487 | 55.10 |
| N-023 | 3-Q | 0.090  | 36.36   | 0.679 | 0.74   | 0.324 | 3.18   | N-084 | 2-A, 4-D | 0.260 | 293.94 | 0.851 | 26.26 | 0.481 | 53.18 |
| N-024 | 3-R | 0.102  | 54.55   | 0.672 | -0.30  | 0.326 | 3.82   | N-085 | 2-A, 4-P | 0.270 | 309.09 | 0.853 | 26.56 | 0.484 | 54.14 |
| N-025 | 3-O | 0.125  | 89.39   | 0.661 | -1.93  | 0.330 | 5.10   | N-086 | 2-A, 4-C | 0.261 | 295.45 | 0.894 | 32.64 | 0.476 | 51.59 |
| N-026 | 3-P | 0.107  | 62.12   | 0.653 | -3.12  | 0.315 | 0.32   | N-087 | 2-A, 4-I | 0.118 | 78.79  | 0.938 | 39.17 | 0.402 | 28.03 |
| N-027 | 3-N | 0.088  | 33.33   | 0.659 | -2.23  | 0.325 | 3.50   | N-088 | 2-A, 4-S | 0.214 | 224.24 | 0.883 | 31.01 | 0.469 | 49.36 |
| N-028 | 3-A | -0.084 | -227.27 | 0.337 | -50.00 | 0.223 | -28.98 | N-089 | 2-A, 4-J | 0.288 | 336.36 | 0.874 | 29.67 | 0.493 | 57.01 |
| N-029 | 3-C | 0.115  | 74.24   | 0.646 | -4.15  | 0.323 | 2.87   | N-090 | 2-C, 4-P | 0.329 | 398.48 | 0.865 | 28.34 | 0.469 | 49.36 |
| N-030 | 3-J | 0.120  | 81.82   | 0.634 | -5.93  | 0.315 | 0.32   | N-091 | 2-C, 4-C | 0.309 | 368.18 | 0.925 | 37.24 | 0.446 | 42.04 |
| N-031 | 4-O | 0.253  | 283.33  | 0.859 | 27.45  | 0.475 | 51.27  | N-092 | 2-C, 4-I | 0.349 | 428.79 | 0.677 | 0.45  | 0.440 | 40.13 |
| N-032 | 4-H | 0.262  | 296.97  | 0.895 | 32.79  | 0.477 | 51.91  | N-093 | 2-C, 4-S | 0.262 | 296.97 | 0.888 | 31.75 | 0.430 | 36.94 |
| N-033 | 4-A | 0.230  | 248.48  | 0.687 | 1.93   | 0.427 | 35.99  | N-094 | 2-C, 4-J | 0.328 | 396.97 | 0.898 | 33.23 | 0.469 | 49.36 |
| N-034 | 4-G | 0.231  | 250.00  | 0.914 | 35.61  | 0.461 | 46.82  | N-095 | 2-C, 4-O | 0.309 | 368.18 | 0.841 | 24.78 | 0.455 | 44.90 |
| N-035 | 4-E | 0.216  | 227.27  | 0.903 | 33.98  | 0.452 | 43.95  | N-096 | 2-C, 4-A | 0.279 | 322.73 | 0.769 | 14.09 | 0.440 | 40.13 |
| N-036 | 4-D | 0.264  | 300.00  | 0.871 | 29.23  | 0.473 | 50.64  | N-097 | 2-C, 4-H | 0.316 | 378.79 | 0.882 | 30.86 | 0.457 | 45.54 |
| N-037 | 4-P | 0.271  | 310.61  | 0.876 | 29.97  | 0.485 | 54.46  | N-098 | 2-C, 4-G | 0.312 | 372.73 | 0.847 | 25.67 | 0.434 | 38.22 |

|       |          |        |         |       |        |       |        |       |          |       |        |       |       |       |       |
|-------|----------|--------|---------|-------|--------|-------|--------|-------|----------|-------|--------|-------|-------|-------|-------|
| N-038 | 4-C      | 0.256  | 287.88  | 0.939 | 39.32  | 0.465 | 48.09  | N-099 | 2-C, 4-E | 0.304 | 360.61 | 0.930 | 37.98 | 0.460 | 46.50 |
| N-039 | 4-I      | 0.221  | 234.85  | 1.087 | 61.28  | 0.438 | 39.49  | N-100 | 2-C, 4-D | 0.310 | 369.70 | 0.853 | 26.56 | 0.448 | 42.68 |
| N-040 | 4-S      | 0.216  | 227.27  | 0.906 | 34.42  | 0.454 | 44.59  | N-101 | 2-D, 4-H | 0.331 | 401.52 | 0.891 | 32.20 | 0.468 | 49.04 |
| N-041 | 4-J      | 0.291  | 340.91  | 0.924 | 37.09  | 0.496 | 57.96  | N-102 | 2-D, 4-A | 0.267 | 304.55 | 0.817 | 21.22 | 0.433 | 37.90 |
| N-042 | 1-A, 2-A | -0.091 | -237.88 | 0.638 | -5.34  | 0.250 | -20.38 | N-103 | 2-D, 4-O | 0.332 | 403.03 | 0.844 | 25.22 | 0.459 | 46.18 |
| N-043 | 1-A, 2-C | 0.205  | 210.61  | 0.724 | 7.42   | 0.350 | 11.46  | N-104 | 2-D, 4-G | 0.320 | 384.85 | 0.934 | 38.58 | 0.439 | 39.81 |
| N-044 | 1-A, 2-D | 0.216  | 227.27  | 0.720 | 6.82   | 0.340 | 8.28   | N-105 | 2-D, 4-E | 0.314 | 375.76 | 0.928 | 37.69 | 0.481 | 53.18 |
| N-045 | 1-H, 2-A | -0.138 | -309.09 | 0.652 | -3.26  | 0.247 | -21.34 | N-106 | 2-D, 4-D | 0.322 | 387.88 | 0.890 | 32.05 | 0.463 | 47.45 |
| N-046 | 1-H, 2-C | 0.108  | 63.64   | 0.781 | 15.88  | 0.342 | 8.92   | N-107 | 2-D, 4-P | 0.356 | 439.39 | 0.876 | 29.97 | 0.478 | 52.23 |
| N-047 | 1-H, 2-D | 0.041  | -37.88  | 0.749 | 11.13  | 0.281 | -10.51 | N-108 | 2-D, 4-C | 0.330 | 400.00 | 0.935 | 38.72 | 0.462 | 47.13 |
| N-048 | 1-G, 2-A | 0.143  | 116.67  | 0.641 | -4.90  | 0.345 | 9.87   | N-109 | 2-D, 4-I | 0.344 | 421.21 | 0.728 | 8.01  | 0.438 | 39.49 |
| N-049 | 1-G, 2-C | 0.279  | 322.73  | 0.693 | 2.82   | 0.365 | 16.24  | N-110 | 2-D, 4-S | 0.296 | 348.48 | 0.925 | 37.24 | 0.444 | 41.40 |
| N-050 | 1-G, 2-D | 0.209  | 216.67  | 0.605 | -10.24 | 0.334 | 6.37   | N-111 | 2-D, 4-J | 0.361 | 446.97 | 0.918 | 36.20 | 0.484 | 54.14 |
| N-051 | 1-A, 3-Q | 0.173  | 162.12  | 0.723 | 7.27   | 0.360 | 14.65  | N-112 | 3-Q, 4-O | 0.278 | 321.21 | 0.858 | 27.30 | 0.484 | 54.14 |
| N-052 | 1-H, 3-Q | 0.073  | 10.61   | 0.779 | 15.58  | 0.349 | 11.15  | N-113 | 3-Q, 4-H | 0.281 | 325.76 | 0.887 | 31.60 | 0.491 | 56.37 |
| N-053 | 1-G, 3-Q | 0.224  | 239.39  | 0.674 | 0.00   | 0.363 | 15.61  | N-114 | 3-Q, 4-A | 0.259 | 292.42 | 0.907 | 34.57 | 0.450 | 43.31 |
| N-054 | 1-A, 4-O | 0.238  | 260.61  | 0.799 | 18.55  | 0.459 | 46.18  | N-115 | 3-Q, 4-G | 0.280 | 324.24 | 0.894 | 32.64 | 0.464 | 47.77 |
| N-055 | 1-A, 4-H | 0.232  | 251.52  | 0.846 | 25.52  | 0.456 | 45.22  | N-116 | 3-Q, 4-E | 0.262 | 296.97 | 0.915 | 35.76 | 0.500 | 59.24 |
| N-056 | 1-A, 4-A | 0.158  | 139.39  | 0.724 | 7.42   | 0.408 | 29.94  | N-117 | 3-Q, 4-D | 0.289 | 337.88 | 0.879 | 30.42 | 0.487 | 55.10 |
| N-057 | 1-A, 4-G | 0.234  | 254.55  | 0.774 | 14.84  | 0.416 | 32.48  | N-118 | 3-Q, 4-C | 0.286 | 333.33 | 0.939 | 39.32 | 0.479 | 52.55 |
| N-058 | 1-A, 4-E | 0.190  | 187.88  | 0.849 | 25.96  | 0.449 | 42.99  | N-119 | 3-Q, 4-P | 0.301 | 356.06 | 0.875 | 29.82 | 0.497 | 58.28 |

---

|       |          |       |        |       |       |       |       |       |          |       |        |       |       |       |       |
|-------|----------|-------|--------|-------|-------|-------|-------|-------|----------|-------|--------|-------|-------|-------|-------|
| N-059 | 1-A, 4-D | 0.248 | 275.76 | 0.856 | 27.00 | 0.460 | 46.50 | N-120 | 3-Q, 4-I | 0.216 | 227.27 | 0.745 | 10.53 | 0.397 | 26.43 |
| N-060 | 1-A, 4-P | 0.246 | 272.73 | 0.828 | 22.85 | 0.466 | 48.41 | N-121 | 3-Q, 4-S | 0.238 | 260.61 | 0.849 | 25.96 | 0.444 | 41.40 |
| N-061 | 1-A, 4-C | 0.225 | 240.91 | 0.857 | 27.15 | 0.439 | 39.81 | N-122 | 3-Q, 4-J | 0.294 | 345.45 | 0.897 | 33.09 | 0.496 | 57.96 |

---



**Table S3** Prediction and evaluation of functional characteristics and environmental safety of NOR substitute molecules

| Compounds | Genotoxicity |                 | Biodegradation |                 | Compounds | Genotoxicity |                 | Biodegradation |                 |
|-----------|--------------|-----------------|----------------|-----------------|-----------|--------------|-----------------|----------------|-----------------|
|           | Predicted    | Change rate (%) | Predicted      | Change rate (%) |           | Predicted    | Change rate (%) | Predicted      | Change rate (%) |
| NOR       | 7.875        |                 | 0.800          |                 | NOR       | 7.875        |                 | 0.800          |                 |
| N-031     | 8.388        | 6.51            | 1.326          | 65.75           | N-085     | 8.460        | 7.43            | 0.525          | -34.38          |
| N-032     | 8.830        | 12.13           | 1.435          | 79.38           | N-086     | 8.725        | 10.79           | 0.971          | 21.38           |
| N-034     | 8.290        | 5.27            | 1.332          | 66.50           | N-088     | 8.794        | 11.67           | 0.879          | 9.87            |
| N-035     | 8.564        | 8.75            | 1.685          | 110.63          | N-089     | 9.575        | 21.59           | 0.775          | -3.13           |
| N-036     | 8.718        | 10.70           | 1.662          | 107.75          | N-090     | 8.038        | 2.07            | 0.693          | -13.38          |
| N-037     | 7.986        | 1.41            | 1.430          | 78.75           | N-091     | 8.207        | 4.22            | 1.097          | 37.13           |
| N-038     | 8.091        | 2.74            | 1.733          | 116.63          | N-093     | 8.340        | 5.90            | 1.076          | 34.50           |
| N-039     | 9.019        | 14.53           | 1.978          | 147.25          | N-094     | 8.989        | 14.15           | 0.941          | 17.63           |
| N-040     | 8.306        | 5.47            | 1.691          | 111.38          | N-095     | 8.453        | 7.34            | 0.595          | -25.63          |
| N-041     | 9.038        | 14.77           | 1.688          | 111.00          | N-096     | 10.155       | 28.95           | 0.364          | -54.50          |
| N-054     | 8.650        | 9.84            | 2.538          | 217.25          | N-097     | 8.908        | 13.12           | 0.702          | -12.25          |
| N-055     | 9.092        | 15.45           | 2.707          | 238.38          | N-098     | 8.491        | 7.82            | 0.580          | -27.50          |
| N-057     | 8.551        | 8.58            | 2.794          | 249.25          | N-099     | 8.634        | 9.64            | 1.064          | 33.00           |
| N-058     | 8.825        | 12.06           | 3.192          | 299.00          | N-100     | 8.747        | 11.07           | 0.985          | 23.13           |
| N-059     | 8.980        | 14.03           | 2.792          | 249.00          | N-101     | 8.591        | 9.09            | 0.582          | -27.25          |
| N-060     | 8.248        | 4.74            | 2.643          | 230.38          | N-102     | 9.833        | 24.86           | 0.324          | -59.50          |
| N-061     | 8.353        | 6.07            | 3.033          | 279.13          | N-103     | 8.127        | 3.20            | 0.425          | -46.88          |
| N-063     | 8.567        | 8.79            | 3.281          | 310.13          | N-104     | 8.090        | 2.73            | 0.509          | -36.38          |
| N-064     | 9.300        | 18.10           | 2.822          | 252.75          | N-105     | 8.292        | 5.30            | 1.045          | 30.63           |
| N-065     | 8.668        | 10.07           | 1.846          | 130.75          | N-106     | 8.417        | 6.88            | 0.881          | 10.13           |
| N-066     | 9.109        | 15.67           | 2.008          | 151.00          | N-107     | 7.770        | -1.33           | 0.465          | -41.88          |
| N-068     | 8.569        | 8.81            | 1.985          | 148.13          | N-108     | 7.858        | -0.22           | 0.995          | 24.38           |
| N-069     | 8.843        | 12.29           | 2.455          | 206.88          | N-110     | 8.024        | 1.89            | 0.810          | 1.25            |
| N-070     | 8.998        | 14.26           | 2.217          | 177.13          | N-111     | 8.702        | 10.50           | 0.769          | -3.88           |
| N-071     | 8.266        | 4.97            | 1.973          | 146.63          | N-112     | 8.299        | 5.38            | 1.464          | 83.00           |
| N-072     | 8.371        | 6.30            | 2.431          | 203.88          | N-113     | 9.000        | 14.29           | 1.559          | 94.88           |

|       |        |       |       |        |       |        |       |       |        |
|-------|--------|-------|-------|--------|-------|--------|-------|-------|--------|
| N-074 | 8.585  | 9.02  | 2.530 | 216.25 | N-114 | 10.347 | 31.39 | 1.542 | 92.75  |
| N-075 | 9.317  | 18.31 | 2.215 | 176.88 | N-115 | 8.626  | 9.54  | 1.293 | 61.63  |
| N-078 | 7.857  | -0.23 | 0.671 | -16.13 | N-116 | 8.339  | 5.89  | 2.141 | 167.63 |
| N-079 | 8.900  | 13.02 | 0.462 | -42.25 | N-117 | 8.616  | 9.41  | 1.845 | 130.63 |
| N-080 | 10.697 | 35.83 | 0.423 | -47.13 | N-118 | 8.374  | 6.34  | 1.877 | 134.63 |
| N-081 | 9.411  | 19.50 | 0.617 | -22.88 | N-119 | 8.029  | 1.96  | 1.529 | 91.13  |
| N-082 | 8.911  | 13.16 | 0.703 | -12.13 | N-120 | 8.872  | 12.66 | 1.010 | 26.25  |
| N-083 | 9.087  | 15.39 | 0.819 | 2.37   | N-121 | 8.222  | 4.41  | 1.669 | 108.63 |
| N-084 | 9.166  | 16.39 | 0.778 | -2.75  | N-122 | 9.413  | 19.53 | 1.722 | 115.25 |

---

**Table S4** Prediction and evaluation of NOR and its substitutes, based on the ADMET model

| Compounds | Human intestinal absorption | Aqueous solubility (25°C)   |                 | Blood-brain barrier penetration |                 | Cytochrome P450 2D6 (CYP2D6) enzyme inhibition |                 | Plasma protein binding |                 |
|-----------|-----------------------------|-----------------------------|-----------------|---------------------------------|-----------------|------------------------------------------------|-----------------|------------------------|-----------------|
|           | Prediction/Level            | Log (S <sub>w</sub> )/Level | Change rate (%) | logBB/Level                     | Change rate (%) | Bayesian score                                 | Change rate (%) | AlogP98                | Change rate (%) |
| NOR       | 0/Good                      | -2.832/Good                 |                 | -0.940/Low                      |                 | -3.860/Non*                                    |                 | 1.294/Non              |                 |
| N-031     | 0/Good                      | -3.046/Good                 | -7.56           | -0.598/Low                      | 36.38           | -5.241/Non                                     | -35.77          | 1.914/Non              | 47.91           |
| N-032     | 0/Good                      | -3.188/Good                 | -12.57          | -1.264/Low                      | -34.47          | -6.431/Non                                     | -66.60          | 1.119/Non              | -13.52          |
| N-035     | 0/Good                      | -2.990/Good                 | -5.58           | -1.069/Low                      | -13.72          | -9.337/Non                                     | -141.89         | 1.733/Non              | 33.93           |
| N-036     | 0/Good                      | -2.454/Good                 | 13.35           | -1.127/Low                      | -19.89          | -11.938/Non                                    | -209.26         | 1.090/Non              | -15.77          |
| N-039     | 0/Good                      | -2.672/Good                 | 5.65            | -1.612/Low                      | -71.49          | -12.019/Non                                    | -211.36         | 0.880/Non              | -31.99          |
| N-041     | 0/Good                      | -3.261/Good                 | -15.15          | -0.650/Low                      | 30.85           | -5.523/Non                                     | -43.08          | 1.919/Non              | 48.30           |
| N-054     | 0/Good                      | -3.136/Good                 | -10.73          | -1.078/Low                      | -14.68          | -4.490/Non                                     | -16.32          | 2.083/Non              | 60.97           |
| N-055     | 0/Good                      | -3.798/Good                 | -34.11          | Undefined                       | Unknown         | -5.039/Non                                     | -30.55          | 1.288/Non              | -0.46           |
| N-057     | 0/Good                      | -3.198/Good                 | -12.92          | Undefined                       | Unknown         | -5.039/Non                                     | -30.55          | 1.626/Non              | 25.66           |
| N-058     | 0/Good                      | -3.393/Good                 | -19.81          | Undefined                       | Unknown         | -8.576/Non                                     | -122.18         | 1.902/Non              | 46.99           |
| N-059     | 0/Good                      | -2.701/Good                 | 4.63            | Undefined                       | Unknown         | -12.287/Non                                    | -218.31         | 1.259/Non              | -2.70           |
| N-061     | 0/Good                      | -3.424/Good                 | -20.90          | -1.297/Low                      | -37.98          | -4.868/Non                                     | -26.11          | 1.832/Non              | 41.58           |
| N-063     | 0/Good                      | -2.603/Good                 | 8.09            | Undefined                       | Unknown         | -9.220/Non                                     | -138.86         | 1.180/Non              | -8.81           |
| N-064     | 0/Good                      | -3.677/Good                 | -29.84          | -1.130/Low                      | -20.21          | -5.144/Non                                     | -33.25          | 2.088/Non              | 61.36           |
| N-065     | 0/Good                      | -3.223/Good                 | -13.81          | -0.792/Low                      | 15.74           | -4.198/Non                                     | -8.75           | 2.354/Non              | 81.92           |

|       |        |             |        |            |         |             |         |           |       |
|-------|--------|-------------|--------|------------|---------|-------------|---------|-----------|-------|
| N-066 | 0/Good | -3.710/Good | 31.00  | Undefined  | Unknown | -5.318/Non  | 37.78   | 1.558/Non | 20.40 |
| N-068 | 0/Good | -3.112/Good | -9.89  | -1.263/Low | -34.36  | -4.220/Non  | -9.31   | 1.896/Non | 46.52 |
| N-069 | 0/Good | -3.323/Good | -17.34 | Undefined  | Unknown | -8.903/Non  | -130.64 | 2.172/Non | 67.85 |
| N-070 | 0/Good | -2.709/Good | 4.34   | -1.320/Low | -40.43  | -10.936/Non | -183.31 | 1.529/Non | 18.16 |
| N-072 | 0/Good | -3.342/Good | -18.01 | -1.011/Low | -7.55   | -4.451/Non  | -15.31  | 2.102/Non | 62.44 |
| N-074 | 0/Good | -2.606/Good | 7.98   | -1.345/Low | -43.09  | -9.410/Non  | -143.76 | 1.450/Non | 12.06 |
| N-075 | 0/Good | -3.600/Good | -27.12 | -0.843/Low | 10.32   | -3.879/Non  | -0.50   | 2.359/Non | 82.30 |
| N-099 | 0/Good | -3.045/Good | -7.52  | -1.216/Low | -29.36  | -9.651/Non  | -150.02 | 1.716/Non | 32.61 |
| N-113 | 0/Good | -3.579/Good | -26.38 | -1.147/Low | -22.02  | -5.726/Non  | -48.34  | 1.497/Non | 15.69 |
| N-114 | 0/Good | -3.429/Good | -21.08 | -1.187/Low | -26.28  | -5.750/Non  | -48.95  | 1.731/Non | 33.77 |
| N-115 | 0/Good | -3.052/Good | -7.77  | -0.952/Low | -1.28   | -4.628/Non  | -19.90  | 1.834/Non | 41.73 |
| N-117 | 0/Good | -2.841/Good | -0.32  | -1.010/Low | -7.45   | -10.440/Non | -170.46 | 1.467/Non | 13.37 |
| N-118 | 0/Good | -3.385/Good | -19.53 | -0.701/Low | 25.43   | -3.986/Non  | -3.26   | 2.04/Non  | 57.65 |
| N-120 | 0/Good | -3.058/Good | -7.98  | -1.495/Low | -59.04  | -11.024/Non | -185.59 | 1.257/Non | -2.86 |
| N-122 | 0/Good | -3.648/Good | -28.81 | -0.533/Low | 43.30   | -4.056/Non  | -5.06   | 2.297/Non | 77.51 |

---

\*Non: None.

**Table S5–1** The prediction and evaluation of the animal carcinogenicity and mutagenicity of NOR and its substitutes, based on the TOPKAT model

| Compounds | Probability value/Level |                            |             |            |            |                              |                               |                            |                          |
|-----------|-------------------------|----------------------------|-------------|------------|------------|------------------------------|-------------------------------|----------------------------|--------------------------|
|           | Ames<br>mutagenicity    | NTP rodent carcinogenicity |             |            |            | FDA rodent carcinogenicity   |                               |                            |                          |
|           |                         | Female mouse               | Male mouse  | Female rat | Male rat   | Female mouse<br>Non vs. Carc | Male mouse<br>Single vs. Mult | Female rat<br>Non vs. Carc | Male rat<br>Non vs. Carc |
| NOR       | 0.937/Mut*              | 0.378/Non*                 | 0.674/Carc* | 0.500/Non  | 0.671/Carc | 0.217/Non                    | 0.125/Non                     | 0.137/Non                  | 0.091/Non                |
| N-031     | 0.920/Mut               | 0.454/Non                  | 0.738/Carc  | 0.515/Carc | 0.671/Carc | 0.231/Non                    | 0.102/Non                     | 0.152/Non                  | 0.125/Non                |
| N-032     | 0.949/Mut               | 0.366/Non                  | 0.684/Carc  | 0.534/Carc | 0.706/Carc | 0.231/Non                    | 0.112/Non                     | 0.157/Non                  | 0.141/Non                |
| N-035     | 0.799/Mut               | 0.388/Non                  | 0.607/Carc  | 0.548/Non  | 0.669/Carc | 0.207/Non                    | 0.131/Non                     | 0.139/Non                  | 0.144/Non                |
| N-036     | 0.758/Mut               | 0.317/Non                  | 0.593/Carc  | 0.495/Non  | 0.685/Carc | 0.208/Non                    | 0.113/Non                     | 0.142/Non                  | 0.136/Non                |
| N-039     | 0.803/Mut               | 0.332/Non                  | 0.456/Non   | 0.494/Non  | 0.696/Carc | 0.221/Non                    | 0.137/Non                     | 0.151/Non                  | 0.138/Non                |
| N-041     | 0.926/Mut               | 0.310/Non                  | 0.631/Carc  | 0.515/Non  | 0.642/Carc | 0.225/Non                    | 0.133/Non                     | 0.164/Non                  | 0.156/Non                |
| N-054     | 0.733/Mut               | 0.469/Non                  | 0.631/Carc  | 0.505/Non  | 0.534/Non  | 0.232/Non                    | 0.137/Non                     | 0.178/Non                  | 0.176/Non                |
| N-061     | 0.713/Non               | 0.383/Non                  | 0.614/Carc  | 0.506/Non  | 0.535/Non  | 0.217/Non                    | 0.151/Non                     | 0.176/Non                  | 0.168/Non                |
| N-064     | 0.732/Mut               | 0.327/Non                  | 0.608/Carc  | 0.508/Non  | 0.521/Non  | 0.222/Non                    | 0.145/Non                     | 0.176/Non                  | 0.173/Non                |
| N-065     | 0.757/Mut               | 0.483/Non                  | 0.612/Carc  | 0.480/Non  | 0.553/Non  | 0.228/Non                    | 0.136/Non                     | 0.180/Non                  | 0.176/Non                |
| N-068     | 0.750/Mut               | 0.354/Non                  | 0.609/Carc  | 0.504/Non  | 0.555/Non  | 0.227/Non                    | 0.141/Non                     | 0.181/Non                  | 0.181/Non                |
| N-070     | 0.663/Non               | 0.355/Non                  | 0.510/Non   | 0.448/Non  | 0.570/Non  | 0.206/Non                    | 0.117/Non                     | 0.171/Non                  | 0.178/Non                |
| N-072     | 0.750/Mut               | 0.386/Non                  | 0.614/Carc  | 0.498/Non  | 0.549/Non  | 0.224/Non                    | 0.135/Non                     | 0.179/Non                  | 0.181/Non                |

|       |           |           |            |            |            |           |           |           |           |
|-------|-----------|-----------|------------|------------|------------|-----------|-----------|-----------|-----------|
| N-074 | 0.766/Mut | 0.433/Non | 0.535/Non  | 0.472/Non  | 0.580/Non  | 0.232/Non | 0.136/Non | 0.186/Non | 0.183/Non |
| N-075 | 0.768/Mut | 0.331/Non | 0.592/Carc | 0.483/Non  | 0.498/Non  | 0.222/Non | 0.139/Non | 0.183/Non | 0.187/Non |
| N-099 | 0.543/Non | 0.388/Non | 0.609/Carc | 0.578/Carc | 0.742/Carc | 0.219/Non | 0.139/Non | 0.189/Non | 0.200/Non |
| N-113 | 0.801/Mut | 0.389/Non | 0.628/Carc | 0.525/Non  | 0.709/Carc | 0.233/Non | 0.100/Non | 0.170/Non | 0.147/Non |
| N-114 | 0.791/Mut | 0.329/Non | 0.675/Carc | 0.535/Carc | 0.650/Carc | 0.233/Non | 0.123/Non | 0.169/Non | 0.146/Non |
| N-115 | 0.783/Mut | 0.385/Non | 0.620/Carc | 0.535/Carc | 0.702/Carc | 0.232/Non | 0.114/Non | 0.169/Non | 0.150/Non |
| N-117 | 0.776/Mut | 0.345/Non | 0.599/Carc | 0.501/Non  | 0.688/Carc | 0.223/Non | 0.115/Non | 0.172/Non | 0.136/Non |
| N-118 | 0.778/Mut | 0.394/Non | 0.680/Carc | 0.541/Carc | 0.681/Carc | 0.228/Non | 0.118/Non | 0.171/Non | 0.155/Non |
| N-120 | 0.793/Mut | 0.356/Non | 0.476/Non  | 0.496/Non  | 0.699/Carc | 0.228/Non | 0.132/Non | 0.172/Non | 0.139/Non |
| N-122 | 0.793/Mut | 0.338/Non | 0.613/Carc | 0.523/Non  | 0.644/Carc | 0.229/Non | 0.122/Non | 0.171/Non | 0.154/Non |

\*Non: None, Mut: Mutagen, Carc: Carcinogen.

**Table S5–2** Prediction and evaluation of skin sensitization, skin irritation, and eye irritation of NOR and its substitutes based on the TOPKAT model

| Compounds | Probability value |                                    |                                       |                                  |                                  |                                 |
|-----------|-------------------|------------------------------------|---------------------------------------|----------------------------------|----------------------------------|---------------------------------|
|           | Skin irritancy    | Skin sensitization<br>NON vs. SENS | Skin sensitization<br>(Weak vs. Stro) | Ocular irritancy<br>(NON vs Irr) | Ocular irritancy<br>Mild vs. SEV | Ocular irritancy<br>Mod vs. SEV |
| NOR       | 0.957/Non*        | 0.800/SENS*                        | 0.897/Stro*                           | 0.999/Irr*                       | 0.861/Mod~Sev*                   | 0.585/Sin*                      |
| N-035     | 0.965/Non         | 0.795/SENS                         | 0.971/Stro                            | 0.999/Irr                        | 0.829/Mod~Sev                    | 0.337/Sin                       |
| N-036     | 0.914/Non         | 0.690/Non                          | —                                     | 0.999/Irr                        | 0.828/Mod~Sev                    | 0.245/Sin                       |
| N-039     | 0.942/Non         | 0.782/SENS                         | 0.926/Stro                            | 0.999/Irr                        | 0.833/Mod~Sev                    | 0.238/Sin                       |

|       |           |            |            |           |               |           |
|-------|-----------|------------|------------|-----------|---------------|-----------|
| N-041 | 0.965/Non | 0.848/SENS | 0.910/Stro | 0.999/Irr | 0.842/Mod~Sev | 0.551/Sin |
| N-054 | 0.949/Non | 0.813/SENS | 0.921/Stro | 0.999/Irr | 0.831/Mod~Sev | 0.572/Sin |
| N-061 | 0.951/Non | 0.857/SENS | 0.905/Stro | 0.999/Irr | 0.837/Mod~Sev | 0.509/Sin |
| N-064 | 0.945/Non | 0.857/SENS | 0.904/Stro | 0.999/Irr | 0.839/Mod~Sev | 0.533/Sin |
| N-065 | 0.957/Non | 0.802/SENS | 0.918/Stro | 0.999/Irr | 0.835/Mod~Sev | 0.586/Sin |
| N-068 | 0.954/Non | 0.849/SENS | 0.911/Stro | 0.999/Irr | 0.841/Mod~Sev | 0.525/Sin |
| N-070 | 0.882/Non | 0.685/Non  | —          | 0.999/Irr | 0.828/Mod~Sev | 0.262/Sin |
| N-072 | 0.960/Non | 0.849/SENS | 0.913/Stro | 0.999/Irr | 0.840/Mod~Sev | 0.528/Sin |
| N-074 | 0.952/Non | 0.675/Non  | —          | 0.999/Irr | 0.827/Mod~Sev | 0.331/Sin |
| N-075 | 0.957/Non | 0.843/SENS | 0.912/Stro | 0.999/Irr | 0.846/Mod~Sev | 0.545/Sin |
| N-112 | 0.965/Non | 0.784/SENS | 0.914/Stro | 0.999/Irr | 0.837/Mod~Sev | 0.600/Sin |
| N-113 | 0.953/Non | 0.852/SENS | 0.910/Stro | 0.999/Irr | 0.840/Mod~Sev | 0.536/Sin |
| N-117 | 0.918/Non | 0.710/Non  | —          | 0.999/Irr | 0.837/Mod~Sev | 0.273/Sin |
| N-120 | 0.947/Non | 0.773/SENS | 0.915/Stro | 0.999/Irr | 0.834/Mod~Sev | 0.249/Sin |
| N-122 | 0.966/Non | 0.848/SENS | 0.915/Stro | 0.999/Irr | 0.850/Mod~Sev | 0.576/Sin |

---

\*Non: None, SENS: Sensitization, Carc: Carcinogen, Stro: Strong, Irr: Irritant, Mod~Sev: Moderate-Severe, Sin: Single

**Table S5–3** Human health risk and ecological risk evaluation of NOR and its substitutes based on the TOPKAT model

| Compounds | Human health risk assessment |                                  |                                     |                        |                | Ecological risk assessment |                                         |                                   |
|-----------|------------------------------|----------------------------------|-------------------------------------|------------------------|----------------|----------------------------|-----------------------------------------|-----------------------------------|
|           | Rat chronic oral LOAEL*      | Rat oral LD <sub>50</sub> * g/kg | Rat inhalational LC <sub>50</sub> * | Developmental toxicity | Hepatotoxicity | Aerobic biodegradability   | Fathead minnow LC <sub>50</sub> * (g/L) | Daphnia EC <sub>50</sub> * (mg/L) |
|           | Concentration /Level         |                                  | Probability value/Level             |                        | Value/Level    | Probability value/Level    | Concentration/Level                     |                                   |
| NOR       | 0.024/High                   | 1.955/Low                        | 22609.500/Mild                      | 0.707/Toxic            | 1.861/Toxic    | 0.163/Non                  | 3.586/Low                               | 249.773/Low                       |
| N-036     | 0.065/High                   | 1.995/Low                        | 26321.100/Mild                      | 0.717/Toxic            | -0.475/Toxic   | 0.233/Non                  | 0.041/Mild                              | 19.575/Mod                        |
| N-039     | 0.018/High                   | 1.239/Low                        | 9023.380/Mild                       | 0.701/Toxic            | 1.510/Toxic    | 0.150/Non                  | 0.216/Low                               | 19.300/Mod                        |
| N-041     | 0.027/High                   | 0.301/Low                        | 18066.100/Mild                      | 0.683/Toxic            | 1.377/Toxic    | 0.135/Non                  | 0.288/Low                               | 46.872/Mod                        |
| N-054     | 0.031/High                   | 0.327/Low                        | 17100.900/Mild                      | 0.639/Toxic            | 0.241/Toxic    | 0.132/Non                  | 0.054/Mild                              | 24.270/Mod                        |
| N-061     | 0.022/High                   | 0.227/Mod                        | 13692.300/Mild                      | 0.661/Toxic            | 1.583/Toxic    | 0.141/Non                  | 0.812/Low                               | 31.208/Mod                        |
| N-064     | 0.033/High                   | 0.121/Mod                        | 8150.460/Mild                       | 0.668/Toxic            | 0.907/Toxic    | 0.127/Non                  | 1.235/Low                               | 34.954/Mod                        |
| N-065     | 0.042/High                   | 1.105/Low                        | 23891.900/Mild                      | 0.629/Toxic            | 0.585/Toxic    | 0.150/Non                  | 0.011/Mild                              | 14.478/Mod                        |
| N-068     | 0.034/High                   | 2.012/Low                        | 14998.300/Mild                      | 0.618/Toxic            | 1.172/Toxic    | 0.129/Non                  | 0.538/Low                               | 33.413/Mod                        |
| N-070     | 0.070/High                   | 1.178/Low                        | 16622.100/Mild                      | 0.716/Toxic            | -0.772/Toxic   | 0.211/Non                  | 0.035/Mild                              | 12.820/Mod                        |
| N-072     | 0.029/High                   | 0.560/Low                        | 19138.000/Mild                      | 0.648/Toxic            | 1.038/Toxic    | 0.149/Non                  | 0.163/Low                               | 9.947/High                        |
| N-074     | 0.042/High                   | 1.523/Low                        | 13538.700/Mild                      | 0.677/Toxic            | 0.685/Toxic    | 0.152/Non                  | 0.074/Mild                              | 21.116/Mod                        |
| N-075     | 0.050/High                   | 0.266/Mod                        | 11407.600/Mild                      | 0.641/Toxic            | 0.768/Toxic    | 0.134/Non                  | 0.248/Low                               | 19.840/Mod                        |
| N-113     | 0.014/High                   | 0.702/Low                        | 14793.100/Mild                      | 0.702/Toxic            | 1.242/Toxic    | 0.117/Non                  | 0.450/Low                               | 80.014/Mod                        |



|       |            |           |                |             |             |           |            |            |
|-------|------------|-----------|----------------|-------------|-------------|-----------|------------|------------|
| N-117 | 0.029/High | 2.400/Low | 28540.200/Mild | 0.659/Toxic | 0.358/Toxic | 0.206/Non | 0.024/Mild | 24.968/Mod |
| N-120 | 0.010/High | 1.284/Low | 9783.150/Mild  | 0.707/Toxic | 1.325/Toxic | 0.146/Non | 0.125/Low  | 20.162/Mod |
| N-122 | 0.014/High | 0.328/Low | 19587.200/Mild | 0.699/Toxic | 0.661/Toxic | 0.135/Non | 0.166/Low  | 56.555/Mod |

\* The evaluation was performed based on the “Acute Oral, Inhalation, and Percutaneous Toxicity Classification for Rats” (Table 2) and the “Ecotoxicological Hazard Classification” (Table 16), cited from the Guidelines for the Hazard Evaluation of New Chemical Substances (HJ/T154–2004), Ministry of Ecology and Environment of the People's Republic of China, April 13, 2004. Non: None, Mod: Moderate.

**Table S6** Calculations of the energy gap, energy, and positive frequency of six NOR substitutes

| <b>Compounds</b> | <b>Energy gap<br/>(eV)</b> | <b>Change rate<br/>(%)</b> | <b>energy<br/>(a. u.)</b> | <b>Change rate<br/>(%)</b> | <b>Positive frequency<br/>(cm<sup>-1</sup>)</b> |
|------------------|----------------------------|----------------------------|---------------------------|----------------------------|-------------------------------------------------|
| NOR              | 4.288                      |                            | -1109.90                  |                            | 28.31                                           |
| N-039            | 4.463                      | 4.06                       | -1279.02                  | -15.24                     | 9.09                                            |
| N-041            | 3.999                      | -6.74                      | -1165.62                  | -5.02                      | 23.61                                           |
| N-068            | 4.476                      | 4.38                       | -1260.70                  | -13.59                     | 23.37                                           |
| N-113            | 4.290                      | 0.05                       | -1204.94                  | -8.56                      | 23.98                                           |
| N-120            | 4.450                      | 3.76                       | -1318.33                  | -18.78                     | 16.64                                           |
| N-122            | 4.225                      | -1.48                      | -1283.55                  | -15.65                     | 20.06                                           |

**Table S7** The binding energy of NOR and its four substitute molecules with 4R1Z and 4HGM

| Compounds | Metabolic enzyme (4R1Z) |                 | concentration enzyme (4HGM) |                 |
|-----------|-------------------------|-----------------|-----------------------------|-----------------|
|           | Binding energy (kJ/mol) | Change rate (%) | Binding energy (kJ/mol)     | Change rate (%) |
| NOR       | -28.525                 |                 | -63.289                     |                 |
| N-039     | -46.131                 | 61.72           | -21.455                     | -66.10          |
| N-068     | -47.044                 | 64.92           | -47.571                     | -24.83          |
| N-113     | -16.324                 | -42.77          | -88.152                     | 39.28           |
| N-120     | -60.179                 | 110.97          | -49.316                     | -22.08          |

**Table S8** Interaction type and the average distance between NOR substitutes and the receptor (4R1Z)

| Compounds | Electrostatic total |                      | Halogen total |                      | Hydrogen bond total |                      | Hydrophobic total |                      |
|-----------|---------------------|----------------------|---------------|----------------------|---------------------|----------------------|-------------------|----------------------|
|           | Amount              | Average distance (Å) | Amount        | Average distance (Å) | Amount              | Average distance (Å) | Amount            | Average distance (Å) |
| NOR       | 0                   | 0.000                | 0             | 0.000                | 7                   | 2.780                | 4                 | 4.785                |
| N-031     | 2                   | 3.825                | 1             | 3.170                | 10                  | 2.887                | 8                 | 4.790                |
| N-032     | 2                   | 3.555                | 1             | 3.390                | 7                   | 2.557                | 4                 | 5.098                |
| N-035     | 0                   | 0.000                | 0             | 0.000                | 8                   | 2.529                | 7                 | 4.547                |
| N-036     | 0                   | 0.000                | 0             | 0.000                | 5                   | 2.660                | 4                 | 4.405                |
| N-039     | 0                   | 0.000                | 3             | 3.053                | 9                   | 2.601                | 8                 | 4.604                |
| N-041     | 2                   | 3.930                | 1             | 3.260                | 7                   | 2.590                | 4                 | 4.680                |
| N-054     | 0                   | 0.000                | 2             | 3.170                | 3                   | 2.670                | 6                 | 3.870                |
| N-055     | 1                   | 3.470                | 0             | 0.000                | 6                   | 2.527                | 2                 | 4.325                |
| N-057     | 1                   | 4.470                | 0             | 0.000                | 5                   | 2.480                | 3                 | 4.713                |
| N-058     | 0                   | 0.000                | 2             | 3.240                | 6                   | 2.390                | 6                 | 4.040                |
| N-059     | 2                   | 3.335                | 0             | 0.000                | 9                   | 2.327                | 5                 | 5.090                |
| N-061     | 0                   | 0.000                | 2             | 3.360                | 7                   | 2.733                | 4                 | 4.258                |
| N-063     | 2                   | 3.410                | 1             | 3.350                | 10                  | 2.758                | 6                 | 4.948                |
| N-064     | 0                   | 0.000                | 1             | 3.470                | 5                   | 2.226                | 4                 | 4.300                |
| N-065     | 0                   | 0.000                | 0             | 0.000                | 4                   | 2.678                | 6                 | 4.458                |
| N-066     | 1                   | 4.110                | 4             | 3.320                | 7                   | 2.550                | 0                 | 0.000                |
| N-068     | 1                   | 4.150                | 3             | 3.213                | 5                   | 2.470                | 1                 | 5.360                |

|       |   |       |   |       |    |       |   |       |
|-------|---|-------|---|-------|----|-------|---|-------|
| N-069 | 0 | 0.000 | 2 | 3.285 | 4  | 2.510 | 6 | 4.463 |
| N-070 | 2 | 4.130 | 0 | 0.000 | 5  | 2.396 | 4 | 4.390 |
| N-072 | 2 | 3.455 | 1 | 3.270 | 10 | 2.774 | 7 | 5.053 |
| N-074 | 1 | 4.990 | 2 | 2.885 | 6  | 2.145 | 4 | 4.015 |
| N-075 | 1 | 4.210 | 3 | 3.200 | 6  | 2.615 | 4 | 5.000 |
| N-099 | 1 | 4.460 | 0 | 0.000 | 8  | 2.480 | 7 | 4.876 |
| N-113 | 1 | 4.880 | 2 | 2.905 | 8  | 2.433 | 6 | 4.608 |
| N-114 | 0 | 0.000 | 0 | 0.000 | 7  | 2.561 | 3 | 4.507 |
| N-115 | 1 | 4.880 | 2 | 3.410 | 3  | 2.730 | 3 | 3.460 |
| N-117 | 0 | 0.000 | 0 | 0.000 | 4  | 2.330 | 7 | 4.758 |
| N-118 | 2 | 3.645 | 1 | 3.070 | 7  | 2.794 | 7 | 4.703 |
| N-120 | 0 | 0.000 | 2 | 3.190 | 5  | 2.592 | 6 | 4.547 |
| N-122 | 0 | 0.000 | 1 | 3.510 | 7  | 2.444 | 8 | 4.571 |

**Table S9** Risk evaluation of NOR and its substitutes by determining nutrition amplification in the food chain

| Compounds | Algae                    |                       | Shrimp                   |                       | Fish                     |                       | Human                    |                       |
|-----------|--------------------------|-----------------------|--------------------------|-----------------------|--------------------------|-----------------------|--------------------------|-----------------------|
|           | $\Delta G_b$<br>(kJ/mol) | Change<br>rate<br>(%) |
| NOR       | -85.384                  |                       | -33.283                  |                       | -28.525                  |                       | -68.504                  |                       |
| N-039     | -91.437                  | 7.09                  | -34.098                  | 2.45                  | -46.131                  | 61.72                 | -88.325                  | 28.93                 |
| N-068     | -95.233                  | 11.53                 | -36.300                  | 9.06                  | -47.044                  | 64.92                 | -105.72                  | 54.33                 |
| N-120     | -109.733                 | 28.52                 | -58.345                  | 75.30                 | -60.179                  | 110.97                | -99.032                  | 44.56                 |

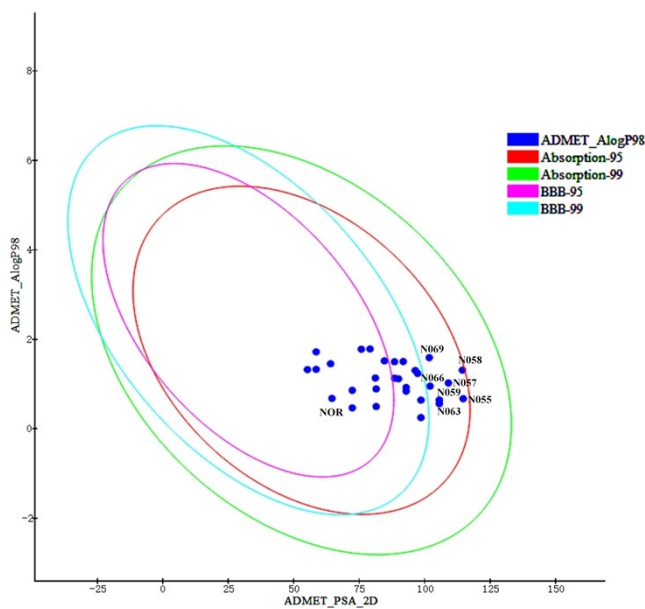

**Fig. S1** The distribution of evaluation indices of the blood-brain barrier penetration (BBB) and the human intestinal absorption (HIA) model of NOR and its substitutes

\*ADMET\_PSA\_2D, or rapid polar surface area, is a descriptive index for evaluating the transportability of drugs in cells; AlogP98 is the distribution coefficient of lipid water.

## References

- 1 M. Sharma, P. Jha, P. Verma and M. Chopra, *Chem. Biol. Drug Des.*, 2019, **93**, 910-925. DOI: 10.1111/cbdd.13488
- 2 W. W. Gu, Y. Zhao, Q. Li and Y. Li, *J. Hazard. Mater.*, 2019, **363**, 316-327. DOI: 10.1016/j.jhazmat.2018.09.060
- 3 J. Comer, S. Judge, D. Matthews, L. Towers, B. Falcone, J. Goodman and J. Dearden, *ADMET & DMPK.*, 2014, **2**, 18-32. DOI: 10.5599/admet.2.1.33
- 4 A. Golbamaki, A. Cassano, A. Lombardo, Y. Moggio, M. Colafranceschi and E. Benfenati, *SAR QSAR Environ. Res.*, 2014, **25**, 673-694. DOI: 10.1080/1062936X.2014.923041
- 5 Ministry of Ecology and Environment of the People's Republic of China, 2004. HJ/T154-2004 the Guidelines for the Hazard Evaluation of New Chemical Substances. China Environmental Press, Beijing, China.
